# Supplementary material for: Sensitive determination of 4,6-dinitro-o-cresol based on a glassy carbon electrode modified with Zr-UiO-66 metal–organic framework entrapped FMWCNTs
Source: Royal Society of Chemistry journal article supplement (doi:10.1039/d3ay01723k), 2023-11-22
Supplement: d3ay01723k1.pdf [file d3ay01723k1.pdf]

## Sensitive determination of 4,6-Dinitro-o-cresol based on Glassy Carbon Electrode modified with Zr-UiO-66 metal-organic framework entrapped FMWCNT

Ranjit Hazarika <sup>a</sup>, Gullit Deffo <sup>a, b</sup>, Honore Nogholesso Wamba <sup>b, c</sup>, Nayab Hussain <sup>a</sup>, Shyamali Kalita <sup>a</sup>, Mwina Basumatary <sup>a</sup>, Evangéline Njanja <sup>b</sup>, Soumen Dasgupta <sup>c</sup>, Panchanan Puzari <sup>a \*</sup>.

<sup>a</sup> Department of Chemical Sciences, Tezpur University, Tezpur, Assam 784028, India.

<sup>b</sup> Electrochemistry and Chemistry of Materials, Department of Chemistry, Faculty of Science, University of Dschang, P.O. Box 67, Dschang, Cameroon.

<sup>c</sup> CSIR-Indian Institute of Petroleum, Dehradun, 248005, Uttarakhand, India.

\* Corresponding author. E-mail address: [pancha@tezu.ernet.in](mailto:pancha@tezu.ernet.in) (P. Puzari)

### Supporting information

#### SI-1: BET analysis of Zr-UiO-66 and EDX analysis.

Brunauer-Emmett-Teller (BET) characterization shown in Figure SI-1 has been used to determine the geometric surface area of synthesized MOF which is 927 m<sup>2</sup>/g, the Langmuir surface is 1365 m<sup>2</sup>/g, and the micropore volume is 0.24 cm<sup>3</sup>/g.

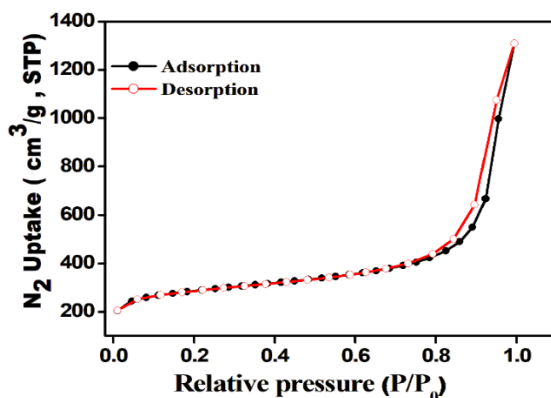

Figure SI-1. Nitrogen isotherms of Zr-UiO-66

#### EDX analysis

Table SI-1 EDX of Zr-UiO-66, MWCNT, FMWCNT, and Zr-UiO-66/FMWCNT

| Film             | % C   | % N   | % O   | % Zr | % Cl  |
|------------------|-------|-------|-------|------|-------|
| Zr-UiO-66        | 34.36 | 17.53 | 5.63  | 7.07 | 36.62 |
| MWCNT            | 94.18 | /     | 5.60  | /    | 0.12  |
| FMWCNT           | 89.15 | /     | 10.69 | /    | 0.07  |
| Zr-UiO-66/FMWCNT | 50.76 | /     | 6.24  | 4.65 | /     |

## SI-2 Determination of Active Surfaces

Figure SI-2A, B show the cyclic voltammograms of 5 mM  $[\text{Fe}(\text{CN})_6]^{3-/4-}$  in 0.1 M KCl, pH 5 recorded at different scan rates from 50 to 300 mV/s on bare GCE (A) and Zr-UiO-66/FMWCNT/GCE (B). The plotting of the peak current against the square root of the scan rate for GCE (Figure SI-2C) and Zr-UiO-66/FMWCNT/GCE (Figure SI-2D), was used to determine the real surface. The real surface of electrodes was calculated using the Randles Sevcik equation ( $I_{pc} = K n^{3/2} A D^{1/2} C V^{1/2}$ ), with the constant  $K = 2.09 \times 10^5$ , the number of electrons exchanged  $n = 1$ , the concentration of the analyte  $C = 5 \text{ mM}$ , the real surface ( $\text{cm}^2$ )  $A$ , the scan rate  $v$ , the diffusion coefficient  $D = 7.6 \times 10^{-6} \text{ cm}^2 \text{ s}^{-1}$  [1]. From the Randles Sevcik equation, the active surface area obtained with bare GCE is  $0.004 \text{ cm}^2$  whereas for Zr-UiO-66/FMWCNT/GCE is  $0.009 \text{ cm}^2$ , showing that the active surface of the modified electrode is 2.25 times higher than the one of bare GCE.

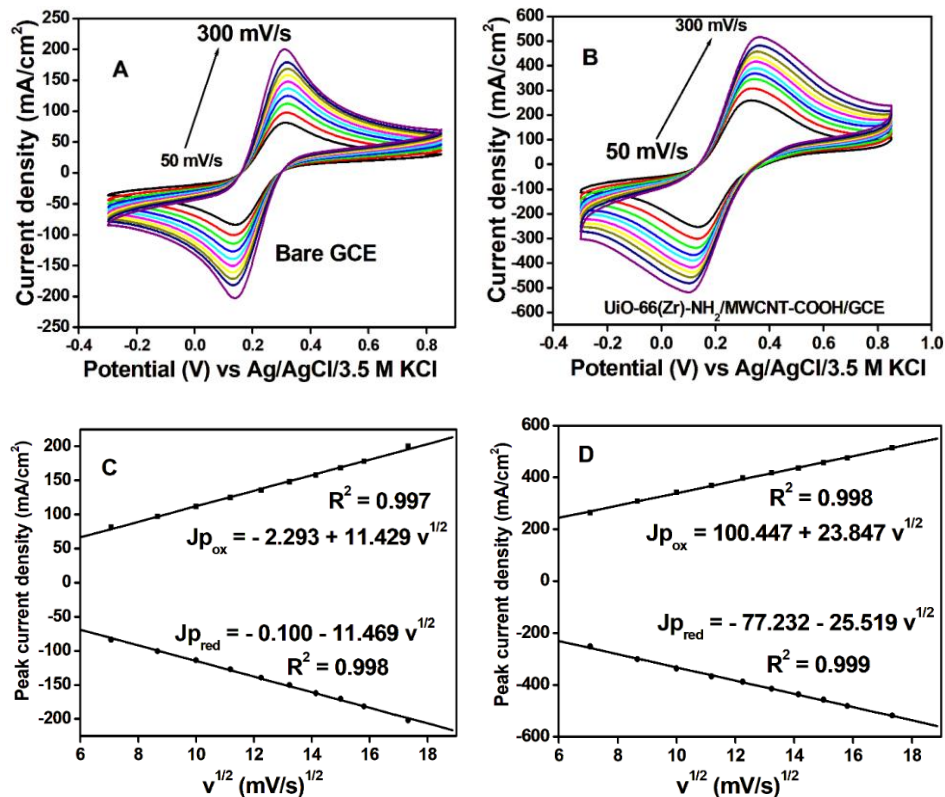

**Figure SI-2.** Multisweep cyclic voltammograms (A and B) and the corresponding peak current versus the root square of the scan rate (C and D) respectively for bare GCE and Zr-UiO-66/FMWCNT/GCE recorded in 0.1 M KCl containing 5 mM  $[\text{Fe}(\text{CN})_6]^{3-/4-}$  at pH 5. The scan rate was 50; 75; 100; 125; 150; 175; 200; 225; 250 and 300  $\text{mV s}^{-1}$ .

**SI-3: Determination of heterogeneous rate constant of the various electrode modifications using EIS with 5 mM [Fe (CN)<sub>6</sub>]<sup>3-/4-</sup>.**

The apparent heterogeneous rate constant  $k_{app}$  and the real heterogeneous rate constants  $k_0$  were calculated by using equation (1) and (2).<sup>2-4</sup>

$$k_{app} = \frac{RT}{F^2 C} \frac{1}{R_{CT}} \text{ cms}^{-1} \quad (1)$$

$$k_0 = \frac{RT}{n^2 F^2 CA} \frac{1}{R_{CT}} \text{ cms}^{-1} \quad (2)$$

| Electrode     | $R_{CT}$ Ohm | $k_{app} = \frac{RT}{F^2 C} \frac{1}{R_{CT}} \text{ cms}^{-1}$ | $k_0 = \frac{RT}{n^2 F^2 CA} \frac{1}{R_{CT}} \text{ cms}^{-1}$ |
|---------------|--------------|----------------------------------------------------------------|-----------------------------------------------------------------|
| GC            | 316.40       | 1.7 X 10 <sup>-4</sup>                                         | 0.0425                                                          |
| MOF-GC        | 280.20       | 1.9X 10 <sup>-4</sup>                                          | 0.0502                                                          |
| FMWCNT-GC     | 146.80       | 3.7 X 10 <sup>-4</sup>                                         | 0.0591                                                          |
| FMWCNT-MOF-GC | 95.24        | 5.7X 10 <sup>-4</sup>                                          | 0.0753                                                          |

With  $R = 8.314 \text{ JK}^{-1}\text{mol}^{-1}$ ;  $T = 305\text{K}$ ;  $F = 96485 \text{ Cmol}^{-1}$ ; and  $C = 0.005 \text{ molL}^{-1}$

$$\frac{RT}{F^2 C} = 5.447 \times 10^{-5}$$

$$k_{app} = (5.447 \times 10^{-5}) \frac{1}{R_{CT}} \times 10^3 \text{ cm s}^{-1}$$

$k_0$  values obtained by plotting  $R_{CT}$  vs  $1/C$ .

**SI-4: Influence of buffer and the ratio of the composite material**

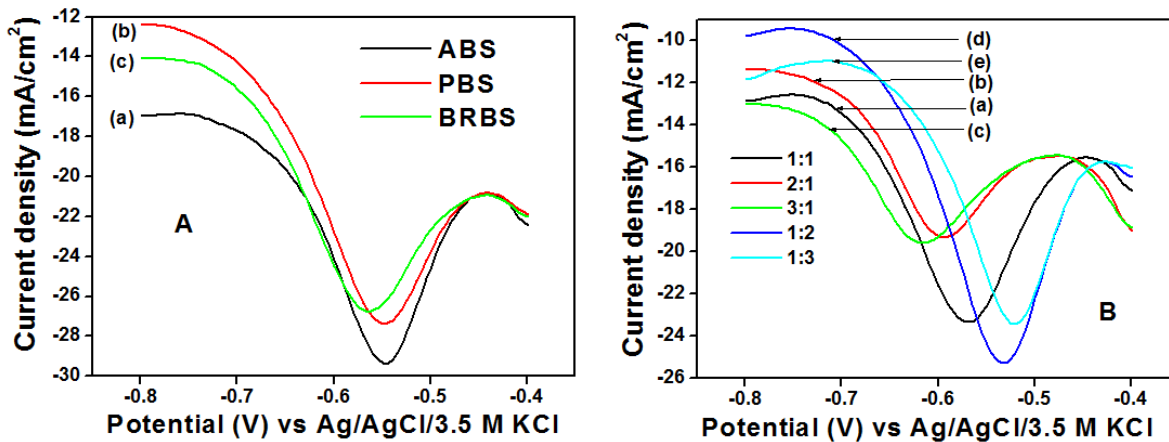

**Figure SI-4.** DPV curve of 50  $\mu\text{M}$  DNOC measured on (A) Zr-UiO-66/FMWCNT/GCE in media (a) acetate buffer, (b) phosphate buffer, and (c) Britton Robinson buffer at pH 5, (B) GCE modified

by Zr-UiO-66 and FMWCNT/GCE in the following ratios. (a) 1.1, (b) 2.1, (c) 3.1, (d) 1.2, and (e) 1.3.

### SI 5: Sensitivity

Sensitivity = slope of the calibration curve

$$=1.249 \text{ mA}/\mu\text{M}$$

$$=1249 \text{ mA}/\text{mM}.$$

### SI-6: Repeatability, Reproducibility and Storage stability

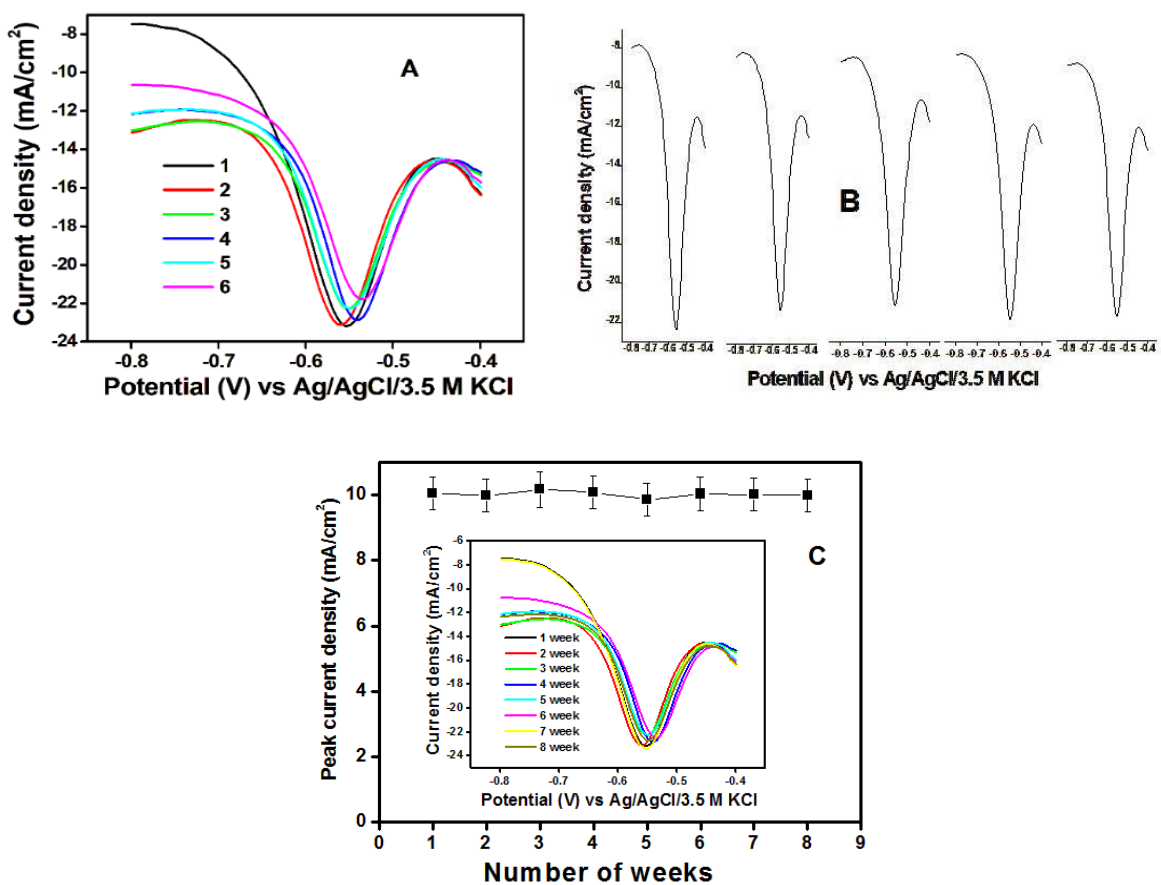

**Figure SI-6.** DPV curve of 50  $\mu\text{M}$  DNOC in ABS (0.1 M, pH 5) for repeatability (A), reproducibility (B), and stability (C) recorded with Zr-UiO-66/MWCNT-COOH/GCE.

## SI-7. Interferences study

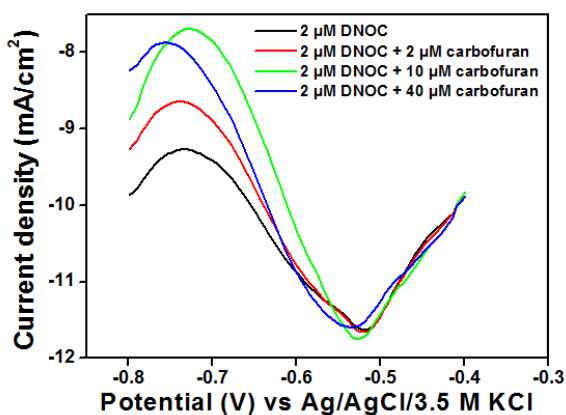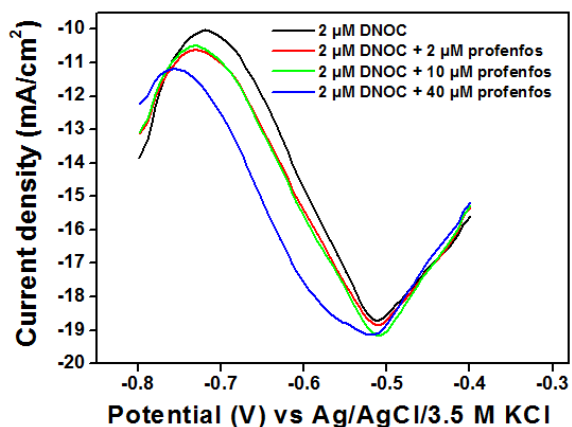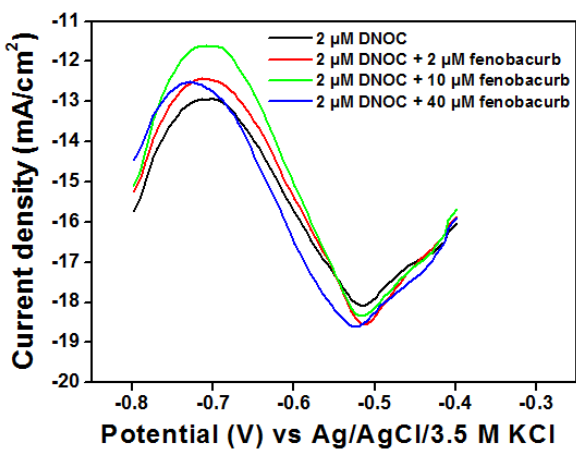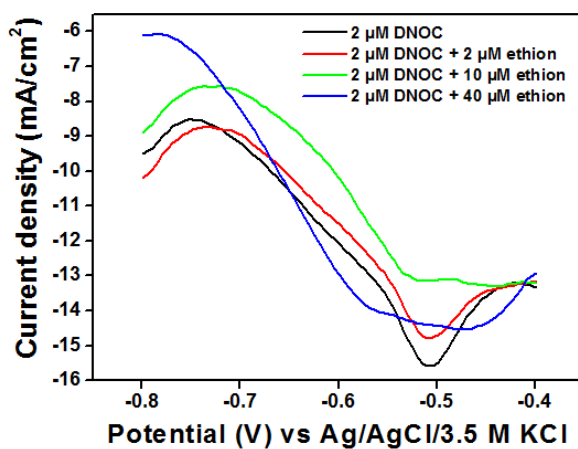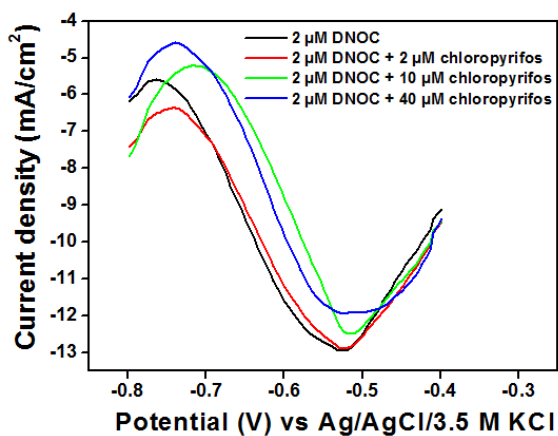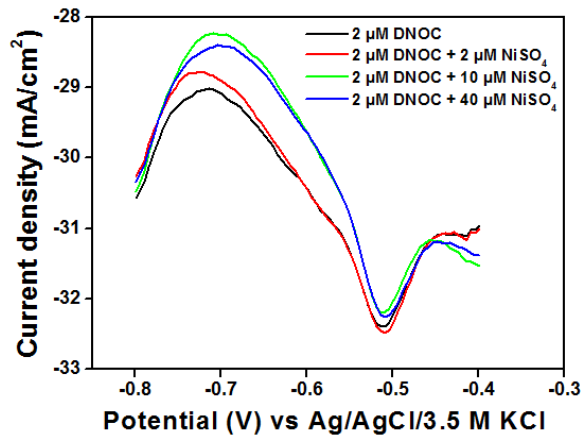

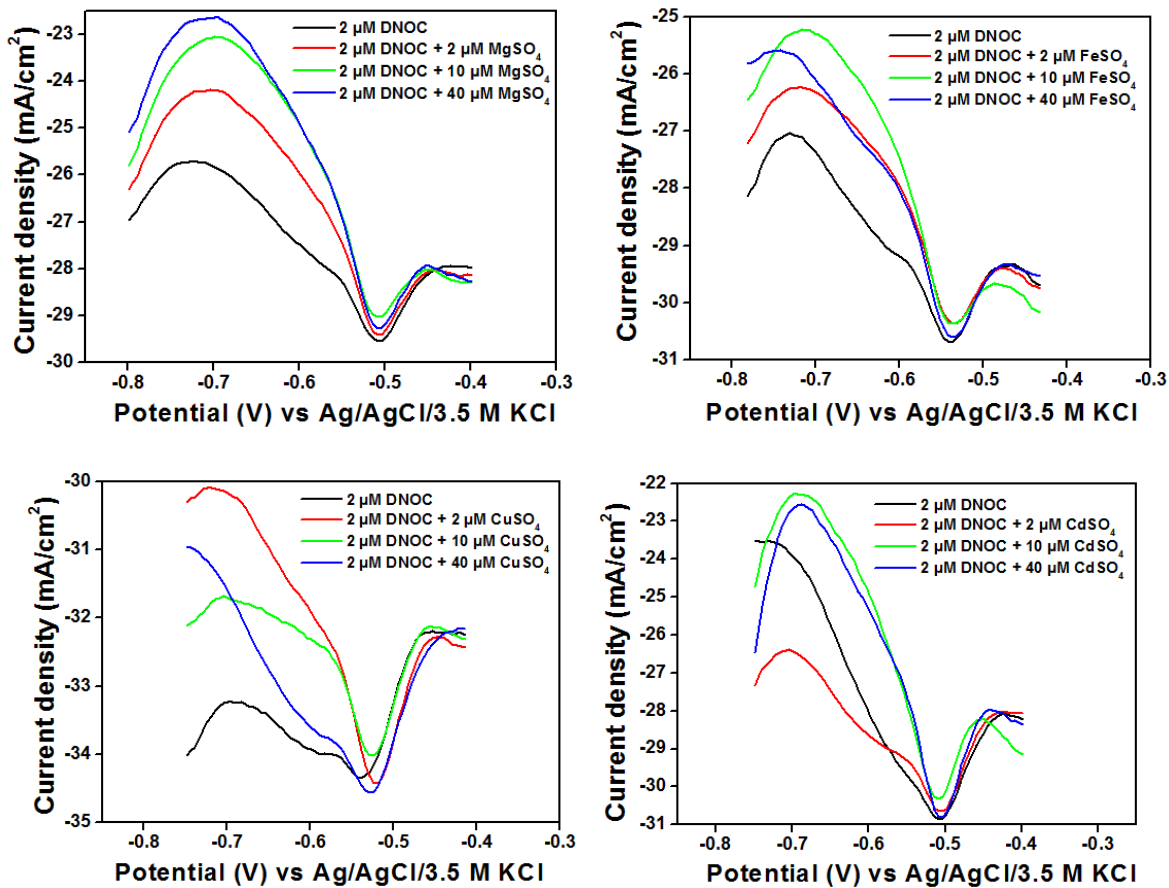

**Figure SI-7.** DPV curves of 2  $\mu\text{M}$  DNOC in ABS pH 5 recorded on Zr-UiO-66/MWCNT-COOH/GCE in the presence of a different concentration of interferences.

**Table SI-2.** Comparison of interfering effects of different pesticides.

| Interference species | Added amount of interference( $\mu\text{M}$ ) over DNOC concentration of 2 $\mu\text{M}$ | Recovery (%)  |
|----------------------|------------------------------------------------------------------------------------------|---------------|
| Carbofuran           | 2                                                                                        | 98.18         |
|                      | 10                                                                                       | 95.9          |
|                      | 40                                                                                       | 99.94         |
| Profenofos           | 2                                                                                        | 97.98         |
|                      | 10                                                                                       | 95.93         |
|                      | 40                                                                                       | 96.56         |
| Fenobacurb           | 2                                                                                        | 104.41        |
|                      | 10                                                                                       | 106.43        |
|                      | 40                                                                                       | 107.44        |
| Ethion               | 2                                                                                        | 67.04         |
|                      | 10                                                                                       | 15.29         |
|                      | 40                                                                                       | No peak found |
| Chloropyrifos        | 2                                                                                        | 100.29        |

|                    |    |        |
|--------------------|----|--------|
|                    | 10 | 92     |
|                    | 40 | 81.48  |
| Nickel Sulphate    | 2  | 102.75 |
|                    | 10 | 96.33  |
|                    | 40 | 96.10  |
| Magnesium Sulphate | 2  | 95.95  |
|                    | 10 | 92.24  |
|                    | 40 | 91.07  |
| Iron Sulphate      | 2  | 97.71  |
|                    | 10 | 97.63  |
|                    | 40 | 89.91  |
| Copper Sulphate    | 2  | 100.61 |
|                    | 10 | 103.43 |
|                    | 40 | 103.46 |
| Cadmium Sulphate   | 2  | 96.06  |
|                    | 10 | 101.62 |
|                    | 40 | 92.12  |

### SI-8. Real medium study and validation of the methods

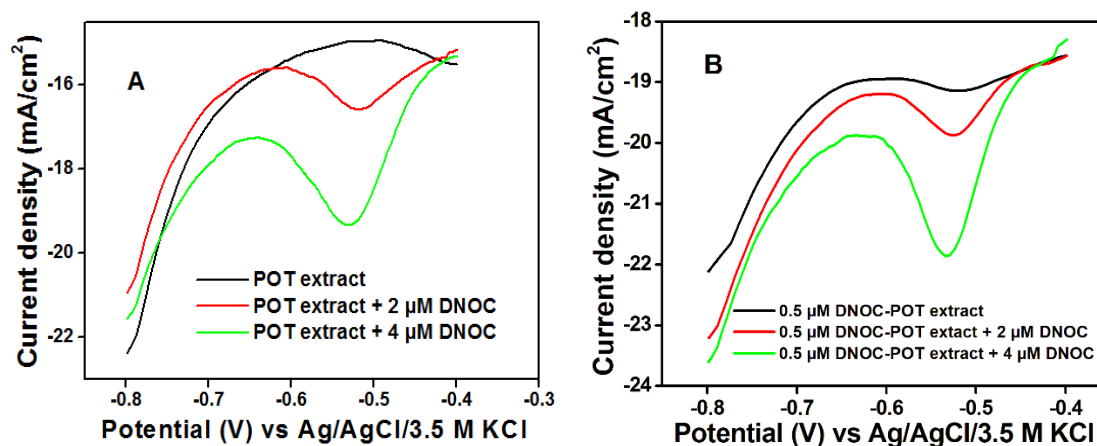

**Figure SI-8.** DPV curves were obtained from pure potato extract with single step spiking (A) and multiple spiking (B).

### References

- [1] G. Deffo, M. Basumatary, N. Hussain, R. Hazarika, S. Kalita, E. Njanja and P. Puzari, *Mater. Today Commun.*, 2022, **33**, 104357.
- [2] F. Sundfors, J. Bobacka, A. Ivaska, A. Lewenstam, Kinetics of electron transfer between  $\text{Fe}(\text{CN})_6^{3-/4-}$  and poly (3,4-ethylenedioxythiophene) studied by electrochemical impedance spectroscopy, *Electrochim. Acta.*, 2002, **47**, 2245-2251.

[3] F. Cruz Moraes, M. F. Cabral, S. A. Machado, and L. H. Mascaroa, Electrocatalytic Behavior of Glassy Carbon Electrodes Modified with Multiwalled Carbon Nanotubes and Cobalt Phthalocyanine for Selective Analysis of Dopamine in Presence of Ascorbic Acid, *Electroanalysis*, 2008, **20**, 851 – 857.

[4] E. P. Randviir, A cross examination of electron transfer rate constants for carbon screen-printed electrodes using Electrochemical Impedance Spectroscopy and Cyclic Voltammetry, *Electrochim. Acta*, 2018, **286**, 179-186. DOI 10.1016/j.electacta.2018.08.021
